# Supplementary material for: Association of Continuity of General Practitioner Care with Utilisation of General Practitioner and Specialist Services in China: A Mixed-Method Study
Source: MDPI journal article supplement (doi:10.3390/healthcare9091206), 2021-09-13
Supplement: s1 [file s1]

## Supplementary Materials

**Table S1. Factor loadings of items and Cronbach's  $\alpha$  of the three dimensions using exploratory factor analysis**

| Questionnaire items                                                                          | IC    | MC    | RC    |
|----------------------------------------------------------------------------------------------|-------|-------|-------|
| 1. I know the GP very well                                                                   | 0.780 |       |       |
| 2. I believe that the GP knows my previous medical history very well                         | 0.891 |       |       |
| 3. I believe the GP knows my living environment very well                                    | 0.842 |       |       |
| 4. I believe the GP knows my daily activities very well                                      | 0.853 |       |       |
| 5. I believe the GP knows a general level of my health very well                             | 0.673 |       |       |
| 6. I feel comfortable consulting the GP about my doubts or health problems                   |       | 0.728 |       |
| 7. During the consultation process, the GP can inquire about my physical condition carefully |       | 0.788 |       |
| 8. The GP is very clear about what kind of treatment is most effective for me                |       | 0.719 |       |
| 9. I can contact the GP easily when needed                                                   |       |       | 0.749 |
| 10. I go to visit the same GP every time I become sick                                       |       |       | 0.762 |
| 11. The GP can provide services in my home, such as home visits or home care beds            |       |       | 0.839 |
| 12. GP can communicate with me and teach me health knowledge                                 |       |       | 0.846 |
| Cronbach's $\alpha$                                                                          | 0.897 | 0.835 | 0.912 |

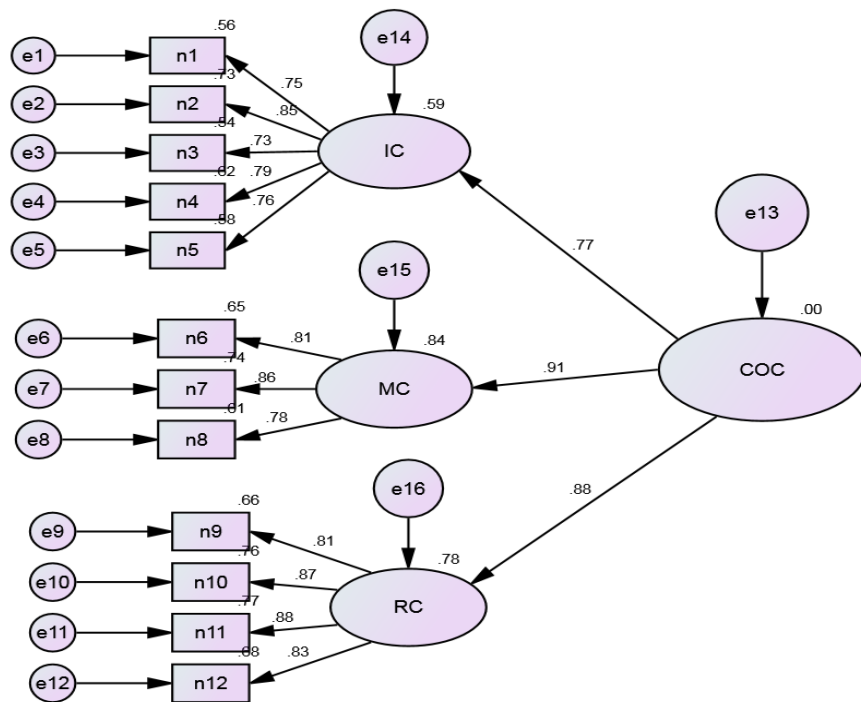

**Figure S1 Structural equation model for confirmatory factor analysis**

**Table S2 Factor loading estimates using confirmatory factor analysis**

| Model paths |   |     | Coefficients |
|-------------|---|-----|--------------|
| IC          | ← | COC | 0.766**      |
| MC          | ← | COC | 0.915**      |
| RC          | ← | COC | 0.881**      |
| IC          | ← | N1  | 0.748**      |
| IC          | ← | N2  | 0.855**      |
| IC          | ← | N3  | 0.734**      |
| IC          | ← | N4  | 0.789**      |
| IC          | ← | N5  | 0.760**      |
| MC          | ← | N6  | 0.808**      |
| MC          | ← | N7  | 0.863**      |
| MC          | ← | N8  | 0.781**      |
| RC          | ← | N9  | 0.815**      |
| RC          | ← | N10 | 0.870**      |
| RC          | ← | N11 | 0.876**      |
| RC          | ← | N12 | 0.826**      |

Note: \*\*:  $p < 0.001$
